# Supplementary material for: Electrostatically Assembled CaO2@MPN-HA Nanoreactors Potentiate Anti-PD-1 Therapy in Thyroid Cancer via Synergistic Ferroptosis and Calcium Overload
Source: Research Square preprint supplement (doi:10.21203/rs.3.rs-8433282/v1), 2026-01-20
Supplement: Supplementary file 1 [file 73b7a945dbec89f4c408c8a7.docx]

1. An innovative PEI "electrostatic bridge" strategy enables robust HA coating on negatively charged MPNs, overcoming interfacial repulsion for enhanced tumor targeting and lysosomal escape.

2. The CaO₂@MPN-HA nanoreactor degrades in the TME, enabling self-supplied H₂O₂, Fe²⁺/Fe³⁺ cycling, and Ca²⁺ burst to synergistically amplify oxidative stress via ferroptosis and calcium overload.

3. Synergistic ion-interference potently triggers ICD, characterized by CRT exposure and HMGB1 release, converting "cold" tumors into immunogenic "hot" tumors.

4. In a thyroid cancer model, CaO₂@MPN-HA synergizes with anti-PD-1 to suppress tumor growth and establish long-term anti-tumor immune memory, offering an "in situ vaccine" strategy.
